# Supplementary material for: Synergistic Energetic Composites: 3D-Printed Al/Ti/CuO-HMX Architectures with Programmable Multiscale Energy Release
Source: Research Square preprint supplement (doi:10.21203/rs.3.rs-6767624/v1), 2025-06-27
Supplement: Supplementary file 1 [file 68c63f9847b1c93ab67c33b3.docx]

Supporting Information

Synergistic Energetic Composites: 3D-Printed Al/Ti/CuO-HMX Architectures with Programmable Multiscale Energy Release

*Yongjin Chen, Hui Ren*, Haoyue, Xin, Xinzhou Wu, Qingjie, Jiao*

*State Key Laboratory of Explosion Science and Safety Protection, Beijing Institute of Technology, Beijing 100081, PR China*

[*chenyongjin1226@163.com*](mailto:chenyongjin1226@163.com) *(Y.-L. Chen);* [*renhui@bit.edu.cn*](mailto:renhui@bit.edu.cn) *(H.Ren.*)*

| 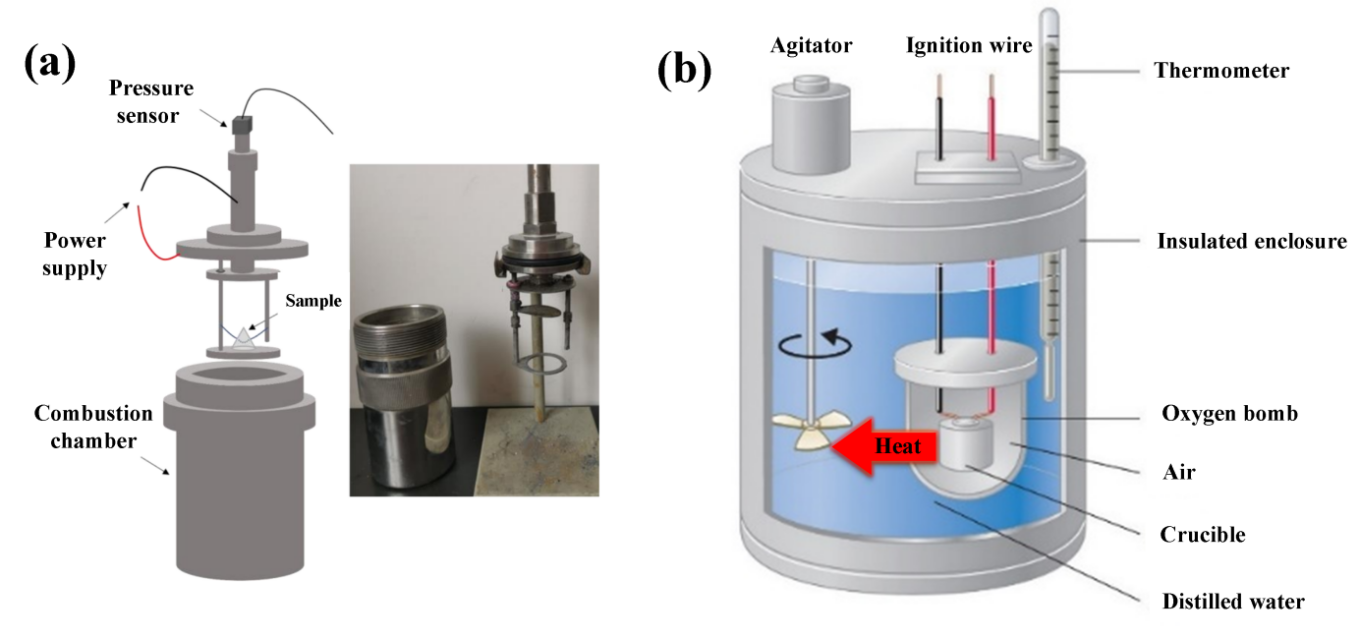 |
| --- |
| **Fig. S1 | a** Schematic diagram and physical diagram of the constant volume combustion chamber. **b** Schematic diagram of oxygen bomb calorimeter. |

| 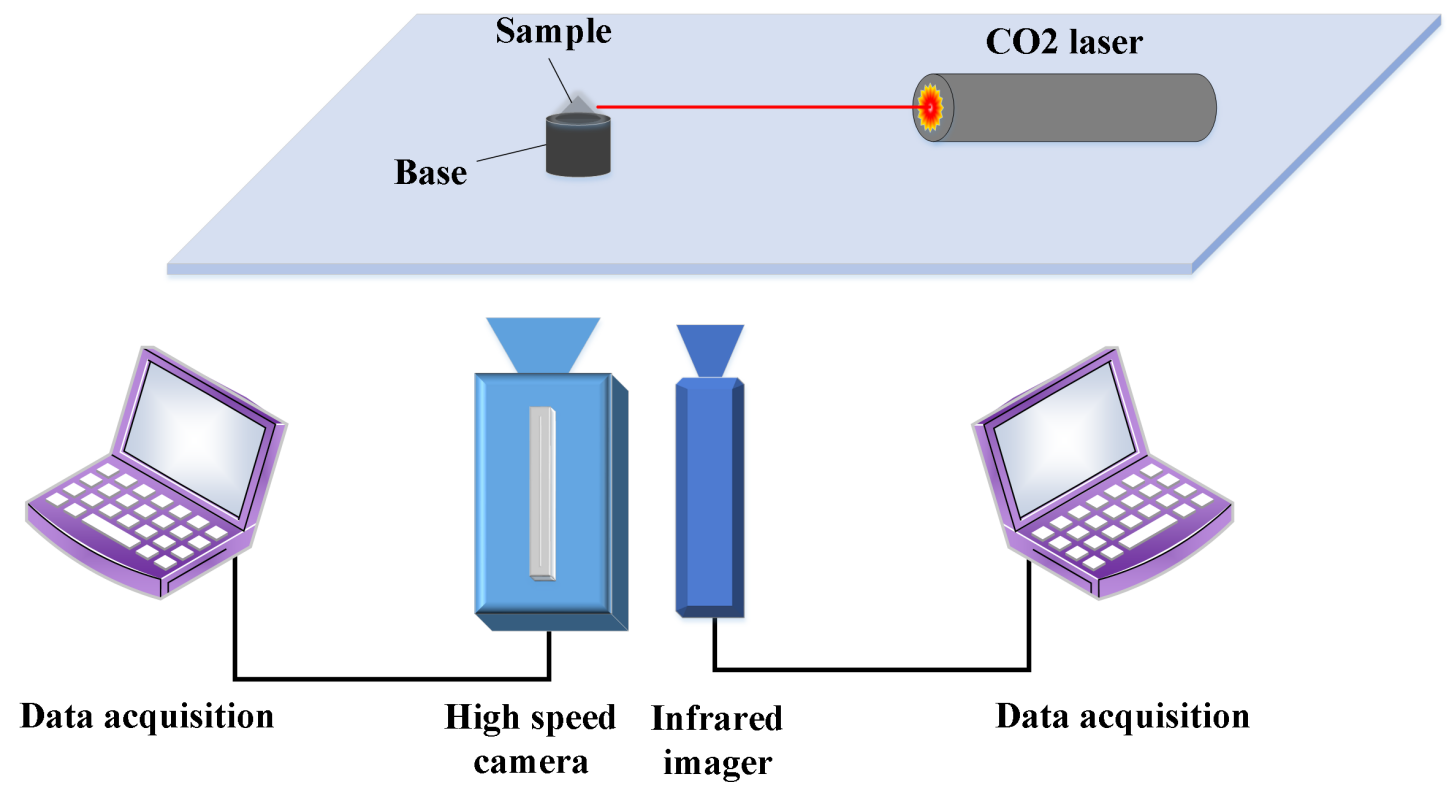 |
| --- |
| **Fig. S2 |** Schematic diagram of laser ignition test experimental device. |

| 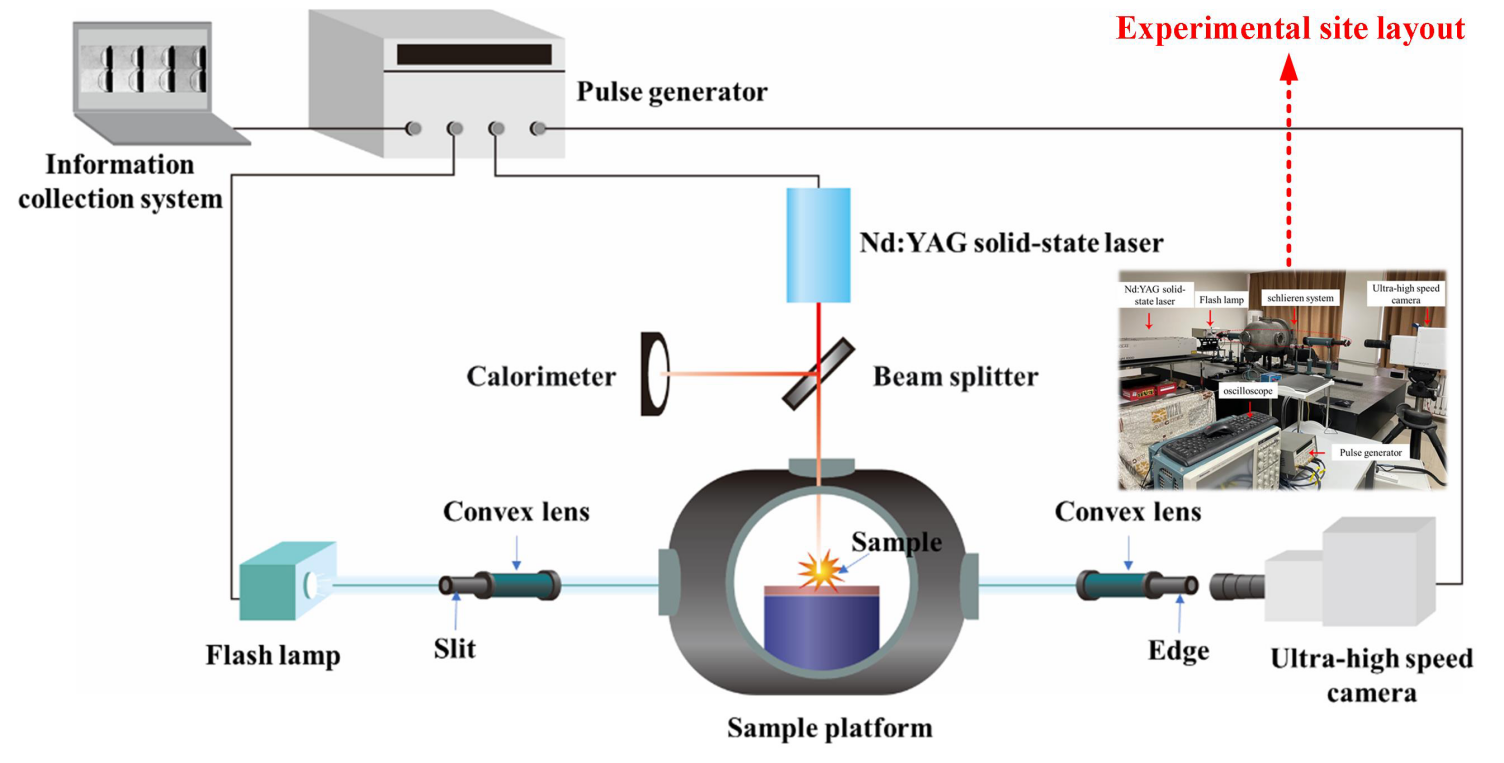 |
| --- |
| **Fig. S3 |** Schematic diagram of self-built micro-explosion laser schlieren test system. |

| 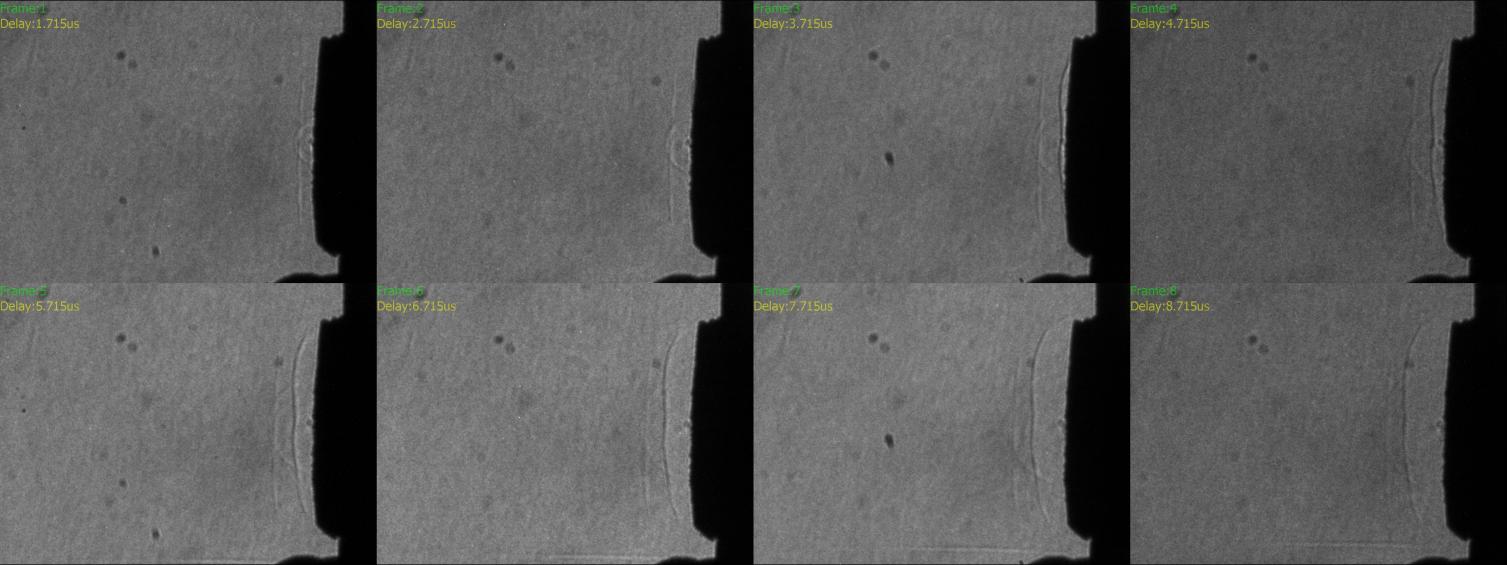 |
| --- |
| **Fig. S4 |** Ultrahigh-speed schlieren images showing plasma and shock wave evolution during ultrafast reactions of HMX. |

| **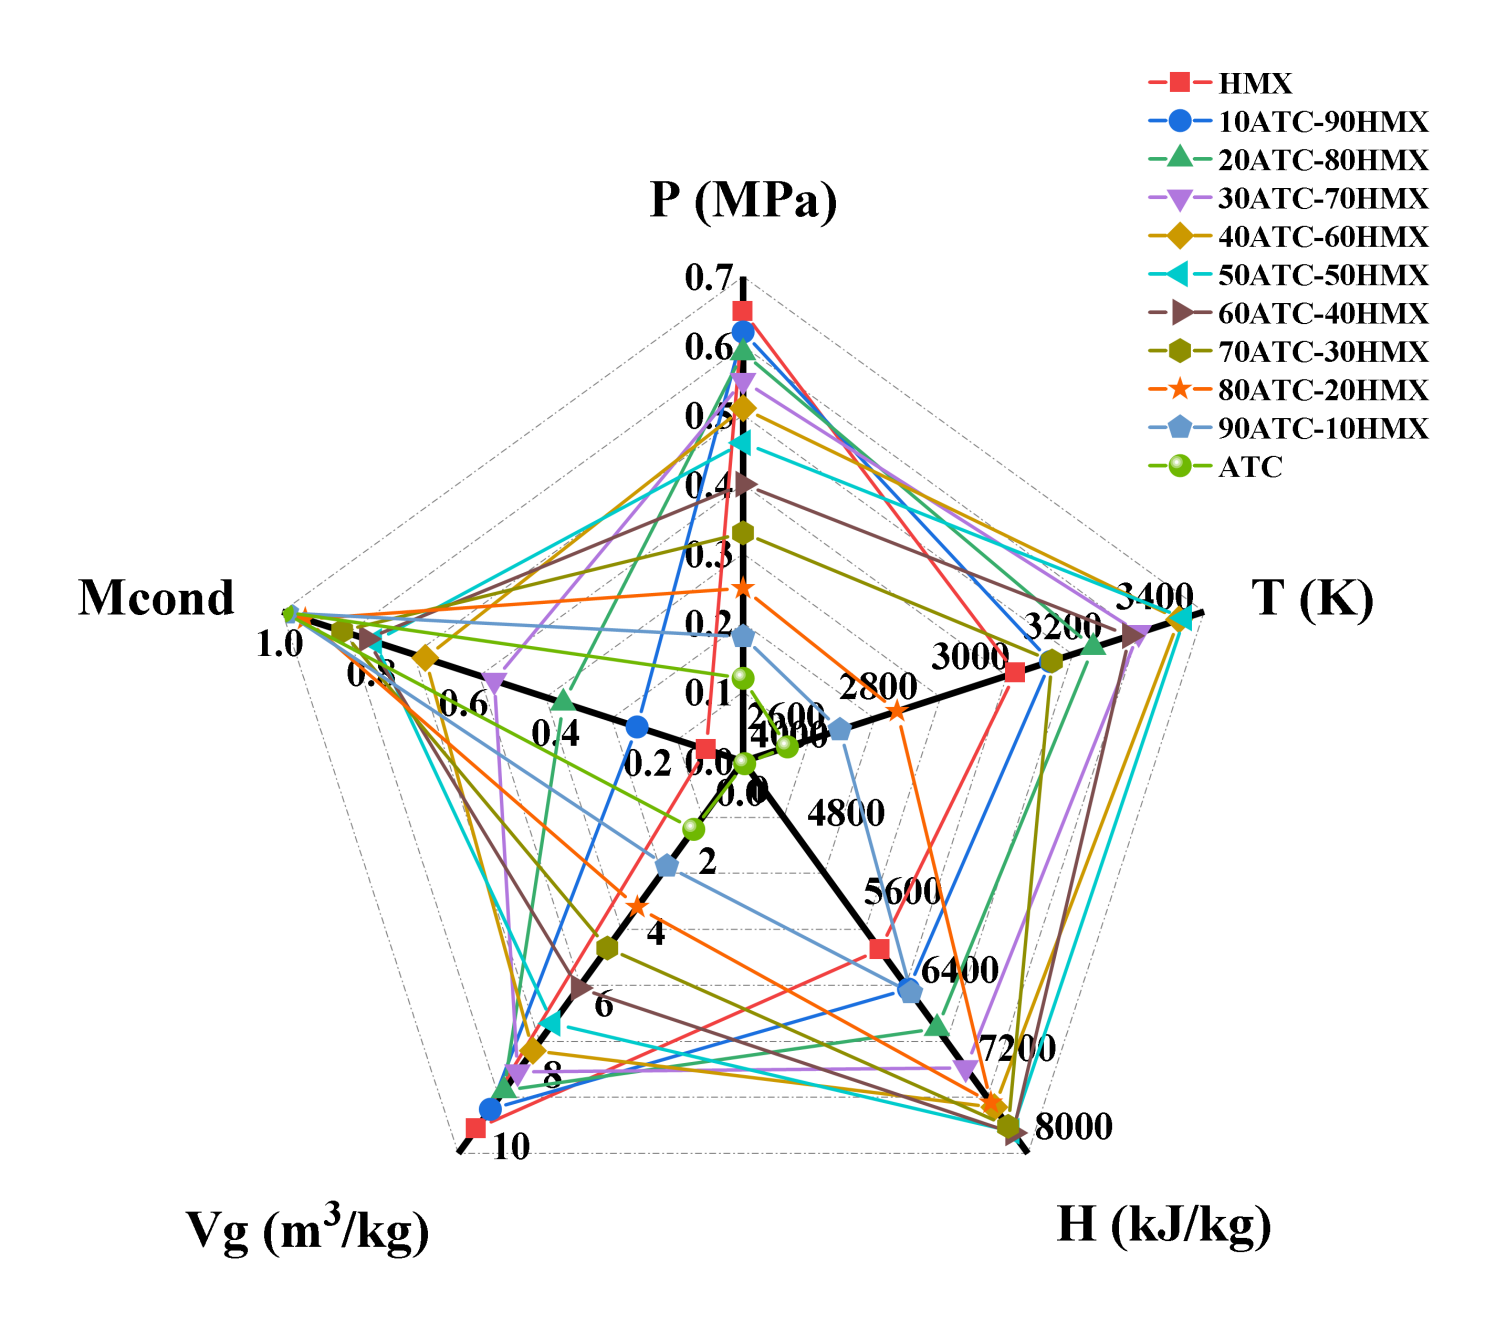** |
| --- |
| **Fig. S5 |** Thermodynamic parameters of the ATC-HMX composite system calculated by the REAL program. |
